# Supplementary material for: Sub-1-volt, reconfigurable Gires-Tournois resonators for full-colour monopixel array
Source: Research Square preprint supplement (doi:10.21203/rs.3.rs-5801345/v1), 2025-08-04
Supplement: Supplementary file 1 [file bd12fff894a89319ecc459a4.docx]

**Title: Supplementary Video 1.
Description:** This video shows the color changes of a reflective display controlled by an applied voltage from -0.2 V to 0.8 V. The color modulation is based on a reversible electrochemical reaction in conducting polymer. The results demonstrate stable and continuous color tuning at low operating voltages, highlighting the potential for low-power reflective display applications.
